# Supplementary material
Source: PubMed Central journal article supplement (PMC2681000)
Supplement: mmc1.pdf [file mmc1.pdf]

## Supplemental Data

### Human RAD50 Deficiency in a

### Nijmegen Breakage Syndrome-like Disorder

Regina Waltes, Reinhard Kalb, Magtouf Gatei, Amanda Kijas, Markus Stumm, Alexandra Sobeck, Britta Wieland, Raymonda Varon, Yaniv Lerenthal, Martin F. Lavin, Detlev Schindler, and Thilo Dörk

**Figure S1. Presentation of the Patient with RAD50 Deficiency**

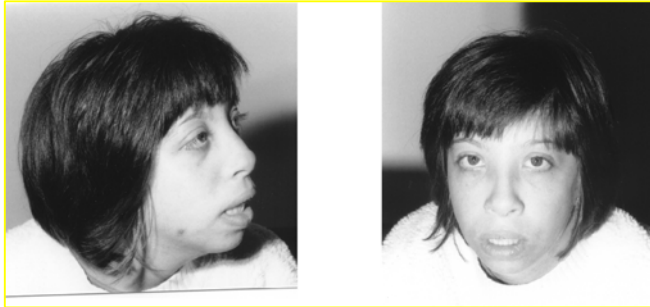

Photograph of the patient at age 15 showing NBS-typical facies and microcephaly. For comparison, note that photographs of the patient during her first 4 years of age have been published previously<sup>1</sup>.

**Figure S2. MRE11-NBN Interaction in RAD50-Deficient Cells**

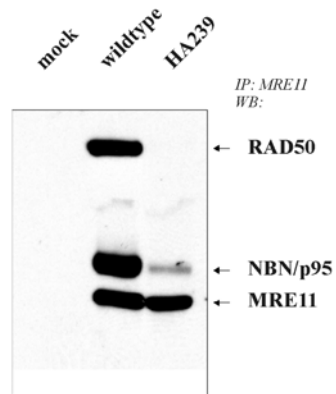

Extracts were prepared from wild-type and RAD50-deficient LCLs (HA239) and immunoprecipitated with anti-MRE11 antibody prior to immunoblotting with antibodies against RAD50, MRE11 and NBN as indicated.

**Figure S3. Chromosomal Aberrations of RAD50-Deficient Cells without Irradiation**

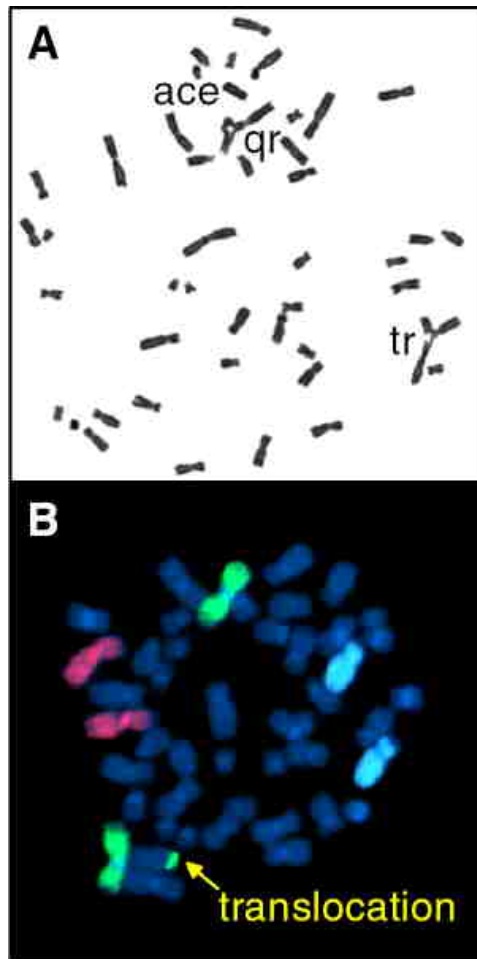

(A) Cytogenetic analysis of Giemsa stained metaphases from Rad50-deficient lymphocytes showed spontaneous chromatid exchanges (chte). **qr** = asymmetrical quadriradial interchange with complete exchanges and acentric fragment (**ace**); **tr** = symmetrical triradial interchange with incomplete exchanges. (B) An example of whole chromosome painting of chromosomes 1 (green), 2 (red) and 4 (light blue) revealing a spontaneous translocation involving one of the chromosomes 1.

**Table S1. Primer Sequences and Genomic PCR Conditions to Amplify 25 Exons of the *RAD50* Gene**

|                                                                 |                               |
|-----------------------------------------------------------------|-------------------------------|
| 5'-AACAGCACCCAGCACCTAGC-3' and 5'-CCTACACCTGTGGAGCCCTA-3'       | (exon 1, annealing 59°C)      |
| 5'-GGTAAACTTCTGTGGTTCTC-3' and 5'-GGTTACTACTGGGTGCTAAA-3'       | (exon 2, annealing 53°C)      |
| 5'-CCAACACTGGTGCTTATTAA-3' and 5'-CAGTACTTTCTGCCCAATTT-3'       | (exon 3, annealing 51°C)      |
| 5'-AACGGGATAGGTGAAGGGCC-3' and 5'-GGTTGCTGCTGGATGAGAGG-3'       | (exon 4, annealing 59°C)      |
| 5'-GTGACAGCATAATATCCCAC-3' and 5'-TTTAGCCAGTCCACGATGTA-3'       | (exon 5, annealing 53°C)      |
| 5'-CAGCCATGTAAGCTATAGTGAG-3' and 5'-ATGTGGATGGCAAAATGGATTC-3'   | (exon 6, annealing 61°C)      |
| 5'-GATCATATTTTCTTATGTTTGTAC-3' and 5'-CATCATAGTAGGAAAAACGACC-3' | (exon 7, annealing 56°C)      |
| 5'-CTCGTGAATCTGCAGCTATCTC-3' and 5'-CAATTCAAGTAGAGAATATGATGC-3' | (exon 8, annealing 56°C)      |
| 5'-TTCTTCAGTGTACATATATCC-3' and 5'-GAACCAAAGAGTCAGAAGATCAAG-3'  | (exon 9, annealing 56°C)      |
| 5'-CCTTAGAGCATATATAGTGCC-3' and 5'-GGCTATTTTAAGTACCAGACAG-3'    | (exon 10, annealing 61°C)     |
| 5'-GATATAATGTGGAGATATAGAC-3' and 5'-CAGGTAAGCATGAAATAAGAG-3'    | (exon 11, annealing 56°C)     |
| 5'-GGTCATACCAAACCTTTGTC-3' and 5'-CAAAGGTGTCAAAGTATCCTG-3'      | (exon 12, annealing 61°C)     |
| 5'-ACAACCGTATTCAGAATACTG-3' and 5'-CTGCTACATGTACAGTGAAGG-3'     | (exon 13, annealing 61°C)     |
| 5'-GAACACAATGTCACCTCTGTGG-3' and 5'-CCTGTACCTGAATACTAGCTAC-3'   | (exon 14, annealing 61°C)     |
| 5'-AAGATTTTGAATAATGCAGTAAG-3' and 5'-CATGTGCTCGCAATGTCAAAGTC-3' | (exon 15, annealing 56°C)     |
| 5'-GCATTTGTGGATTCCATAGACC-3' and 5'-CCTGGGTGACAGAACGAGACTG-3'   | (exon 16, annealing 56°C)     |
| 5'-GAGCCTGGCACATAGAAAGTG-3' and 5'-GACGTGGTGTATGAACATAAG-3'     | (exon 17, annealing 61°C)     |
| 5'-CCTGTTATGTGCCCTTAAGTAC-3' and 5'-GCATTTCTATTCAATGGATCTTC-3'  | (exons 18-19, annealing 61°C) |
| 5'-GTCACCAGTTGCCTGTTACAG-3' and 5'-CTTCACATTCCAGTAATAAAGAC-3'   | (exon 20, annealing 56°C)     |
| 5'-TCTATGACTTTTCCACTTCAGG-3' and 5'-ACTGCAATAAGAAAATCCCCAG-3'   | (exon 21, annealing 58°C)     |
| 5'-CCAAGCAGCAAAGTTTTGCTGCTG-3' and 5'-CATGATGAGAGGTCATAAGGGG-3' | (exon 22, annealing 56°C)     |
| 5'-GCTACAGAGCATAGGTTCCCTC-3' and 5'-CTCTTCAGTACTTGGGTGAG-3'     | (exon 23, annealing 56°C)     |
| 5'-CCCTGCTGAAAAGATCATGTC-3' and 5'-GTGAGATACTTACTCAACCAG-3'     | (exon 24, annealing 56°C)     |
| 5'-GCACAAGTTCATGTGCTGAC-3' and 5'-ATACACTTTCTGAGGACCTAC-3'      | (exon 25, annealing 60°C).    |

**Table S2. Clinical and Laboratory Findings of the RAD50-Deficient Patient**

| <b>CLINICAL FINDINGS</b>                                                                                                                                                                                                                                                                                                                                                  |
|---------------------------------------------------------------------------------------------------------------------------------------------------------------------------------------------------------------------------------------------------------------------------------------------------------------------------------------------------------------------------|
| <p><b><u>Congenital abnormalities</u></b></p> <ul style="list-style-type: none"><li>● NBS-like facies</li><li>● Microcephaly (&lt;3<sup>rd</sup> percentile)</li><li>● Pre- and postnatal growth retardation</li><li>● Very subtle and non-progressive ataxia</li><li>● Mild spasticity</li><li>● Skin hyper- and hypopigmentation, Ø 15 mm</li><li>● Hyperopia</li></ul> |
| <p><b><u>Immunological status</u></b></p> <ul style="list-style-type: none"><li>● No severe or recurrent infections</li><li>● Normal Ig status (IgG,A,M,D and IgG subclasses)</li><li>● Normal lymphocyte counts</li><li>● Normal alpha-fetoprotein levels</li></ul>                                                                                                      |

**Table S3. Spontaneous and Radiation-Induced Chromosomal Breakage Rates in RAD50-Deficient, NBS, and A-T Cells**

|                        | 0 Gy           |                  | 0.5 Gy         |                  | 1.0 Gy         |                  |
|------------------------|----------------|------------------|----------------|------------------|----------------|------------------|
|                        | % <sup>a</sup> | b/m <sup>b</sup> | % <sup>a</sup> | b/m <sup>b</sup> | % <sup>a</sup> | b/m <sup>b</sup> |
| <b>Patient blood</b>   | 24             | 0.54             | 76             | 2.78             | 90             | 3.98             |
| <b>Patient LCL</b>     | 10             | 0.14             | 62             | 1.12             | 91             | 2.15             |
| NBS <sup>c</sup> blood | n=1            |                  | n=1            |                  | n=1            |                  |
|                        | 12             | 0.16             | 60             | 1.16             | 74             | 2.16             |
| NBS <sup>c</sup> LCL   | n=24           |                  | n=11           |                  | n=11           |                  |
|                        | 9±7            | 0.14±0.15        | 55±11          | 1.16±0.32        | 70±12          | 2,38±0.88        |
| AT LCL                 | n=8            |                  | n=6            |                  | n=6            |                  |
|                        | 11±4           | 0.18±0.10        | 69±14          | 1.52±0.29        | 82±17          | 2,78±1.06        |
| Controls blood         | n=96           |                  | n=50           |                  | n=50           |                  |
|                        | 1±2            | 0.02±0.02        | 15±8           | 0.19±0.11        | 22±8           | 0,27±0.10        |
| Control LCL            | n=38           |                  | n=18           |                  | n=18           |                  |
|                        | 2±3            | 0.03±0.04        | 14±8           | 0.19±0.15        | 23±9           | 0,35±0.18        |

Giemsa-stained metaphases from lymphocyte cell cultures and lymphoblastoid cell lines (LCL) were analysed as indicated. n= number of patients or controls analysed in each cohort. 50 metaphases were analysed for each patient/ control. <sup>a</sup>Percentages of aberrant metaphases; <sup>b</sup>breaks/metaphase; <sup>c</sup>all tested NBS cells had truncating mutations in *NBN*<sup>2</sup>.

**Supplemental References**

1. Barbi, G., Scheres, J.M., Schindler, D., Taalman, R.D., Rodens, K., Mehnert, K., Müller, M., and Seyschab, H. (1991). Chromosome instability and X-ray hypersensitivity in a microcephalic and growth-retarded child. *Am. J. Med. Genet.* 40, 44–50.
2. van der Burgt, I., Chrzanowska, K.H., Smeets, D., and Weemaes, C. (1996). Nijmegen breakage syndrome. *J. Med. Genet.* 33, 153–156.
